# Supplementary material
Source: PubMed Central journal article supplement (PMC3281532)
Supplement: supp_en.2011-1750_EN-11-1750tab1.pdf [file supp_en.2011-1750_EN-11-1750tab1.pdf]

**Supplementary Table 1. Subject Characteristics**

|                                         | NGT<br>N=19           | IGT<br>N=20            | T2D<br>N=20            |
|-----------------------------------------|-----------------------|------------------------|------------------------|
| Age, years (range)                      | 32±3 (21-58)          | 56±3* (25-73)          | 53±1*(38-65)           |
| M/F                                     | 8/11                  | 9/11                   | 11/9                   |
| BMI, kg/m <sup>2</sup> (range)          | 24.2±0.4 (21.7-27.5)  | 29.8±0.9* (25.0-42.1)  | 31.4±0.7*(27.4-38.4)   |
| WHR (range)                             | 0.84±0.02 (0.69-1.04) | 1.21±0.04* (0.77-1.42) | 1.28±0.03* (1.09-1.52) |
| GDR, µmol/kg/min (range)                | 76±4 (51-99)          | 19±2* (6-34)           | 21±2* (9-43)           |
| 2 hour Glucose OGTT, mM (range)         | 5.9±0.2 (4.9-7.5)     | 9.4±0.2*(7.9-10.9)     | 13.1±0.3*† (10.9-16.4) |
| HbA1c, % (range)                        | 5.22±0.03 (5.04-5.48) | 5.74±0.04* (5.39-6.18) | 6.37±0.09*†(5.94-7.06) |
| HDL-C, mmol/L                           | 1.60±0.07 (1.20-2.29) | 1.21±0.04* (0.96-1.63) | 1.12±0.04* (0.69-1.44) |
| Triglyceride to HDL-C ratio (range)     | 1.30±0.07 (0.80-1.80) | 1.72±0.12 *(1.10-3.10) | 1.97±0.11*(1.30-2.90)  |
| Systolic BP, mmHg (range)               | 123±2 (105-140)       | 138±1* (126-146)       | 139±1* (129-150)       |
| eGFR, ml/min/1.73m <sup>2</sup> (range) | 107±6 (71-174)        | 76±3* (56-95)          | 75±3* (56-100)         |
| Creatinine, µmol/L (range)              | 70±2 (54-84)          | 84±1*(73-96)           | 88±2*(76-102)          |

The subject characteristics are described previously (5). Data are mean±SE. M/F = male/female; BMI = Body Mass Index; WHR=Waist to Hip Ratio; GDR=Glucose Disposal Rate; OGTT=Oral Glucose Tolerance Test; HbA1c = Glycosylated Hemoglobin; HDL-C=High Density Lipoprotein cholesterol; BP=Blood Pressure; eGFR=Estimated Glomerular Filtration Rate. \*P<0.05 vs. NGT; †<0.05 vs. IGT.
